25 for ADHD, its mechanisms of action have yet to be elucidated. In a previous MEG study, we  
26 demonstrated that MPH in ADHD normalizes beta depression in preparation to motor responses (1).  
27 We here seek to identify the white matter tracts that mediate MPH's effect on beta oscillations.

28 **Methods:** We implemented a double-blind placebo-controlled crossover design, where boys diagnosed  
29 with ADHD underwent behavioral and MEG measurements during a spatial attention task while on and  
30 off MPH. Results were compared with an age/IQ-matched typically developing (TD) group performing  
31 the same task. Estimates of white matter tracts were obtained through diffusion tensor imaging (DTI).  
32 Based on aprioristic selection model criteria, we sought to determine the fiber tracts associated with  
33 electrophysiological, behavioral and clinical features of attentional functions.

34 **Results:** We identified three main tracts: the anterior thalamic radiation (ATR), the Superior  
35 Longitudinal Fasciculus ('parietal endings') (SLFp) and Superior Longitudinal Fasciculus ('temporal  
36 endings') (SLFt). ADHD symptoms severity was associated with lower fractional anisotropy (FA)  
37 within the ATR. In addition, individuals with relatively higher FA in SLFp compared to SLFt showed  
38 faster and more accurate behavioral responses to MPH. Furthermore, the same parieto-temporal FA  
39 gradient explained the effects of MPH on beta modulation: subjects with ADHD exhibiting higher FA  
40 in SLFp compared to SLFt also displayed greater effects of MPH on beta power during response  
41 preparation.

42 **Conclusions:** Based on MPH's modulatory effects on striatal dopamine levels, our data suggest that  
43 the behavioral deficits and aberrant oscillatory modulations observed in ADHD depend on a structural  
44 connectivity imbalance within the SLF, caused by a diffusivity gradient in favor of temporal rather than  
45 parietal, fiber tracts.

## 46 **Introduction**

47 The neural mechanisms underlying selective attention processes are contingent upon a complex  
48 interaction of brain networks. Prior studies using electro- and magneto-encephalography (EEG/MEG)  
49 have provided insights into diverse oscillatory patterns indexing distractor suppression and appropriate  
50 target processing. These start prior to the display of the stimuli, when participants prepare to the  
51 response by specifically allocating attentional resources in order to meet task demands (2–5). One  
52 important function is the preparation to the motor response to a cued target (e.g., button press), which  
53 interacts with visual attentional allocation. The electrophysiological correlate underlying this behavioral  
54 component is visible as a suppression of oscillations in sensorimotor areas. Specifically, modulation of  
55 brain activity in the beta band (15 – 30Hz) has been associated with top-down control of motor  
56 preparation, reflecting an interaction between cognitive and motor functions, which has been interpreted  
57 as increased excitability of task-relevant brain areas (6,7). This motivates the investigation of brain  
58 oscillations during attention tasks in populations with attentional problems.

59 Attention deficit-hyperactivity disorder (ADHD) is a neurodevelopmental disorder characterized by  
60 age-inappropriate levels of inattention and hyperactivity-impulsivity (American Psychiatric  
61 Association, 2013). Aberrant modulation of oscillatory activity has indeed been observed in individuals  
62 identified with ADHD, both in adults (9–11) and pediatric populations (12–14), with the latter  
63 representing the most prominent line of research, given the predominance of the disorder in early life  
64 (15,16). Weaker suppression of  $\beta$ -band activity (13 – 30Hz) has been found in ADHD, prior to response  
65 preparation to a cued target (17), reflecting a lack of appropriate motor planning. Furthermore, recent  
66 evidence has observed weakened beta modulation during working memory encoding in ADHD (18)  
67 consistent with the view that modulation of beta oscillations reflect cognitive functions (19,20).

68 Previously, we showed that beta depression in preparation to responses to a cued target is reduced in  
69 children with ADHD as compared to matched TD peers (1). Additionally, in a double-blind randomized  
70 placebo-controlled design within the ADHD group we showed that MPH restores levels of beta  
71 depression in children with ADHD, by normalizing its values to the ones observed in the TD group.  
72 This effect is allegedly attributable to the effects of psychostimulants on catecholamines' levels in the  
73 midbrain (21). Specifically, MPH blocks the reuptake of norepinephrine and, particularly, dopamine at

74 the synaptic cleft (22–24) increasing their availability. A dopaminergic imbalance within networks  
75 mediated by the prefrontal cortex has indeed been proposed to underlie symptoms of attentional deficits  
76 and hyperactivity (25,26). Consistently, the modulatory action of dopamine is alleged to mediate the  
77 interaction between frontoparietal and default mode attentional networks (27).

78 So far, the link between beta oscillations and brain structure remains yet to be elucidated. This can be  
79 achieved by means of diffusion tensor imaging (DTI), which estimates the direction of diffusion of  
80 water molecules in the brain and is thought to reflect the underlying microstructural properties of white  
81 matter fiber tracts (28,29). Among the DTI-derived metrics is fractional anisotropy (FA), reflecting  
82 coherence of diffusion of water along the main tract direction (30,31) and, allegedly, the underlying  
83 tissue microstructure, such as integrity of myelin sheath, which impacts the overall mobility of water  
84 along axons (32). DTI studies in ADHD have so far pointed to reduced white matter integrity in  
85 widespread areas in the brain (33–35). Diffusion in the angular bundle of the cingulum correlates with  
86 hyperactivity-impulsivity symptomatology and associations of FA with ADHD are not uniformly  
87 distributed across white matter tracts (36). Importantly, the Superior Longitudinal Fasciculus, a white  
88 matter tract known to sustain spatial attention functions (38,39), has been consistently reported among  
89 the structural correlates of ADHD symptoms. In particular, lower integrity (FA) along this bundle has  
90 been associated with severity of ADHD symptoms and behavioral performance on cognitive tests (40–  
91 42). Taking advantage of the spatial resolution offered by MEG and the link to microstructural  
92 connectivity properties offered by DTI, this study aims to study the association between oscillatory and  
93 structural features in relation to attentional impairments in children with ADHD and typically  
94 developing (TD) children. We hence coupled the previously reported electrophysiological results (1)  
95 with an analysis of white matter microstructural properties in the same subjects.

## 96 **Methods and Materials**

97 A detailed explanation of participants' inclusion and exclusion criteria, attentional task, and study  
98 design has been previously described (1) and can be found in *Supplementary Materials*.

## 99 **Participants**

100 The study included 27 children diagnosed with ADHD and 27 typically developing (TD) male children.  
101 A total of 10 children (9 ADHD) withdrew from the experiment after at least one session, due to  
102 unwillingness to proceed and/or excessive complications during testing. As a result, structural and  
103 diffusion-weighted MRI scans and MEG data were acquired for a total of 49 (26 TD) and 46 participants  
104 (26 TD), respectively.

## 105 **Experimental design**

106 The study design is outlined in **Figure 1**. Overall, children in the ADHD group visited the lab three  
107 times, while children in the TD group twice. During the first intake-session, participants from groups  
108 underwent behavioral and IQ testing. For the ADHD group, a further in-depth intake was conducted to  
109 determine the medication dosage to be used during the task, based on operating procedures followed in  
110 prior studies (43). Based on the screening, a standardized dosage was chosen (either 10 or 15mg  
111 Methylphenidate immediate release; IR-MPH). Following the behavioral screenings, the MRI session  
112 took place for a duration of ~30mins.

113 During the second visit, both groups undertook the MEG testing. For the TD group, this constituted the  
114 last day of testing, while for the ADHD group, two MEG sessions were planned at two different visits,  
115 separated by at least one-week interval. The ADHD group performed the MEG task twice, i.e., under  
116 two conditions (MPH and placebo), according to a double-blind placebo controlled randomized design.  
117 Prior to each MEG session, a 24 hour treatment suspension allowed to control for withdrawal symptoms  
118 related to drug administration (rebound effect) (44). MEG testing began one hour after medication  
119 intake, allowing to reach on average moderate plasma concentration ( $C_{max}$ ) of the drug along the  
120 experiment, which progressively increases and reaches its peak around the second hour post-intake (45).  
121 After completion of the MEG session, participants proceeded with their own regular stimulant.

## 122 **The attention task**

123 The task was presented as a child-friendly adaptation of a Posner's cueing paradigm for spatial orienting  
124 of attention, where a central cue (represented with a clown fish looking either at the left or at the right  
125 side of the screen) indicated the upcoming position of a target (a shark with an open mouth). Participants  
126 were asked to indicated via button press the position of the target, while ignoring the distractor on the  
127 opposite screen side (shark with mouth closed) (see **Figure 2**).

128 The experiment consisted of 360 trials, equally divided in 10 blocks, after which the participant was  
129 given the possibility to take a break and/or talk to the parents. Note that, for the ADHD group, the  
130 treatment order for the two MEG sessions was randomized across participants.

### 131 **MEG data acquisition and analysis**

132 Electromagnetic brain activity was recorded from the participants seated in a CTF 275-sensor whole-  
133 head MEG system with axial gradiometers (CTF MEG Systems, VSM MedTech Ltd.). Head position  
134 was monitored throughout the experiment via online head-localization software, allowing, if necessary,  
135 readjustment of the participant's position between blocks. Complete illustration of the steps followed  
136 for the analysis of power and beta oscillatory indices of interest, can be found in our previous paper (1)  
137 and are further described in the Supplementary Materials.

138 Importantly, in the above study, we report how the preparation to motor response to the cued target was  
139 accompanied by a desynchronization of beta oscillations in the MEG data at central sensors. For each  
140 subject, a Beta Preparation Index (PI( $\beta$ )) was hence computed by considering the average beta band  
141 modulation over the sensors and time window of interest ( $f= 15 - 30\text{Hz}$ ,  $-1000 < t < 0$  ms).

142 To estimate MPH modulatory effects exerted on beta preparation, we considered the difference in  
143 PI( $\beta$ ) between MPH drug and placebo in the ADHD sample, referred to as  $\Delta\text{PI}(\beta)$ :

$$\Delta\text{PI}(\beta)_s = \frac{\text{PI}(\beta)_{s,\text{Placebo}} - \text{PI}(\beta)_{s,\text{MPH}}}{\text{PI}(\beta)_{s,\text{Placebo}} + \text{PI}(\beta)_{s,\text{MPH}}} \quad \text{Eq.(1)}$$

144 Based on Eq.1, the larger the  $\Delta PI(\beta)$  the higher the stronger in the beta depression following MPH  
145 intake.

146

### 147 **Structural data analysis**

148 MRI and DTI data were acquired via a 3T MAGNETOM Skyra MR scanner (Siemens AG, Healthcare  
149 Sector, Erlangen, Germany) with a product 32-channel head coil. The protocol included a T1-weighted  
150 MRI scan for anatomical reference and analysis and diffusion-weighted MRI scans for performing fiber  
151 tractography.

152 Anatomical and DTI images were analyzed in FreeSurfer 6.0 (<http://surfer.nmr.mgh.harvard.edu/>). The  
153 TRACULA toolbox (Tracts Constrained by Underlying Anatomy; Yendiki et al., 2011) was  
154 implemented for preprocessing of DWI images and for subsequent delineation of 18 major white matter  
155 tracts (8 bilateral and 2 interhemispheric): corticospinal tract (CST), inferior longitudinal fasciculus  
156 (ILF), uncinate fasciculus (UNC), anterior thalamic radiations (ATR), cingulum-cingulate gyrus bundle  
157 (CCG), cingulum-angular bundle (CAB), superior longitudinal fasciculus-parietal terminations (SLFP),  
158 superior longitudinal fasciculus-temporal terminations (SLFT), corpus callosum forceps major and  
159 minor (Fmaj, Fmin). TRACULA allows the automated reconstruction of major white matter pathways  
160 based on the global probabilistic approach described in (47), and further extends it by incorporating  
161 anatomical knowledge in the prior probability function: each resulting segmented tract is the best fit not  
162 only given the observed diffusion data within each subject, but also given its similarity to the known  
163 tract anatomy in relation to grey matter segmentations from FreeSurfer.

164 Preprocessing steps included eddy current compensation, head motion correction, intra-subject  
165 registration (individual DWI to individual T1), inter-subject registration (individual T1 affine  
166 registration to the MNI template space), creation of cortical masks (parcellation via probabilistic  
167 information estimated from a manually labeled training set based on Desikan-Killiany Atlas, **Figure 3**)  
168 and white-matter masks (based on (44)), tensor fitting for extraction of tensor-based measures,

169 computation of anatomical priors for white-matter pathways reconstruction (e.g., diffusion  
170 eigenvectors, eigenvalues and FA for each voxel). Next, *bedpostx* was applied with a two-fiber, ball-  
171 and-stick model to estimate the distributions of the diffusion parameters and create the input for  
172 probabilistic tractography (49).

173 See **Figure 4** for an example of TRACULA's output in a single healthy TD participant, showing the  
174 posterior distribution for all the white matter pathways included in the segmentation pipeline. Each  
175 participant's scan was then registered to standard MNI space for group-level analyses. A pairwise  
176 correlation matrix for bilateral structures is presented in **Figure 5**, showing that no negative association  
177 was present between tracts' FA values.

178 All statistical analyses were performed in MATLAB2019a. For all analyses, the main metric of interest  
179 was mean FA within the tracts.

#### 180 *Model selection of white matter ROIs*

181 In order to determine the relationship between mean FA along the white matter tracts segmented, as  
182 well as electrophysiological and behavioural measures, we implemented a general linear model (GLM)  
183 specifying the FA values of the white matter structures as regressors for the prediction of each index of  
184 interest.

185 Consistent with the methods implemented in previous work (50), and given the relative heterogeneity  
186 of current results in the field (33,51,52), we implemented a data driven strategy aimed at selecting the  
187 optimal set of or regressors to be included in the model.

188 We started by focusing on the behavioral performance to constrain the optimal model, hence setting  
189 IESs as dependent variable. Next, we considered all possible combinations from 2 to 5 regressors  
190 reflecting the FA values of the bilateral tracts segmented with TRACULA: SLFt, SLFp, ATR, CAB,  
191 CCG, ILF (in addition to the model including all 6 regressors, referred to as the 'full model'). We hence  
192 separately considered the general linear mixed models (maximum likelihood estimation) derived from  
193 all possible combinations of  $n$  regressors, i.e., including either 2, 3, 4 or 5 regressors (i.e. ROIs), by



194 computing all possible unique permutations of  $n$  regressors from the subset defined. This resulted in a  
195 set of models for each of the 4 possibilities using 2, 3, 4 or 5 regressors. Next, for each of these subsets,  
196 we derived the model associated with the lowest *Akaike Information Criterion* (AIC), *Bayesian*  
197 *Information Criterion* (BIC), highest *log likelihood* (where the winning model would be the one  
198 associated with at least two highest criteria compared to the others in the same model subset). These  
199 values have been commonly used in model selection to identify the best predictor subsets for a statistical  
200 model (53). Upon selection, we ended up with the five ‘best’ models, representative of each of the four  
201 model options described above.

202 In a final step, we identified the ‘winning model’ among the 4 selected ones (based on the same criteria  
203 as the previous selection) and compared it with the following full model based on 6 regressors:

$$\text{IES} \sim b_0 + (b_1 \text{FA}_{\text{SLFT}} + b_2 \text{FA}_{\text{SLFP}} + b_3 \text{FA}_{\text{ATR}} + b_4 \text{FA}_{\text{CAB}} + b_5 \text{FA}_{\text{CCG}} + b_6 \text{FA}_{\text{ILF}}) * b_7 \text{Group} + \varepsilon \quad \text{mdl}(1)$$

204 Where *Group* is a categorical variable describing the subjects’ group (ADHD vs TD).

205 We then tested how the winning model could account for ADHD symptoms (ADHD-RS), beta  
206 modulation ( $\text{PI}(\beta)$ ) and modulation of drug related beta oscillatory response ( $\Delta\text{PI}(\beta)$ ).

## 207 **Results**

208 While a total of 22 ADHD and 27 TD children underwent the MR session, only a smaller group of 18  
209 ADHD and 26 TD successfully completed both MEG sessions (see Fig. 2 for the task). In the following  
210 section, we report the results of the latter group, where we quantified the association between white  
211 matter tracts microstructure, behavioral performance and MEG-derived measures. The bigger sample  
212 was considered for the association between diffusion weighted imaging (DWI) results and ADHD  
213 symptoms score.

## 214 Behavioral performance

215 Behavioral performance in the ADHD group significantly improved following MPH administration  
216 ( $t_{(17)}=2.49, p=.023$ ), as reflected by lower inverse efficiency scores (IESs: accuracy/reaction time). No  
217 significant difference in IES was found between TD and ADHD: the TD group did not perform better  
218 when compared to the ADHD group in the Placebo ( $t_{(42)}=-.22, p=.827$ ) nor in the MPH condition ( $t_{(42)}=$   
219  $.77, p=.445$ ).

## 220 Beta desynchronization in preparation to response to the cued target

221 As depicted in **Figure 6**, ADHD subjects in the placebo conditions exhibited lower overall beta  
222 depression, which was restored following MPH intake. This was observed as a diminished  $PI(\beta)$ s with  
223 values closer to those observed in the TD group (see Supplementary Methods and Materials). We will  
224 here focus on the association between beta modulation and white matter microstructural diffusion  
225 properties.

## 226 Definition of white matter structures of interest: model building strategy

227 Following the step-wise model selection criteria described in the *Materials and Methods* section, we  
228 identified a model with 3 regressors as the best fit (AIC= -67.34 and BIC=-53.09, Log  
229 Likelihood=42.67, Adjusted  $R^2=.19$ ) which included the regressors  $FA_{SLFt}$  ( $p=7\times 10^{-4}$ ),  $FA_{SLFp}$  ( $p=.003$ ),  
230 and  $FA_{ATR}$  ( $p=.068$ ). A 3D rendering of the three white matters tracts selected (SLFT, SLFP and ATR)  
231 is illustrated in **Figure 7** and they were considered as ROIs for later linear mixed model analyses.

232 We first enquired whether FA along these tracts differed between groups. We hence used a 2-way  
233 unbalanced ANOVA with factors 'tract' (ATR, SLFp, SLFt) and 'group' ('TD', 'ADHD') in relation  
234 to FA values. While the results yield a main effect of *group* ( $p=.009$ ), showing a group difference in  
235 FA across all tracts, and *tract* ( $p=4.8\times 10^{-13}$ ), reflecting a difference in FA between tracts, no significant  
236 interaction *group by tract* emerged ( $p=.453$ ), indicating that the pattern of FA across tracts was similar  
237 across groups.

## 238 **Functional anisotropy of the Superior Longitudinal Fasciculus relates to behavioral performance**

239 We considered task performance in relation to the three identified tracts of the winning model. Beta  
240 coefficients and adjusted response plots (i.e., showing the response as a function of one predictor,  
241 averaged over the others) derived from the model are shown in **Figure 8**: SLFt and SLFp were  
242 associated with beta coefficients of opposite sign: while higher FA values in the SLFt were associated  
243 with a higher IES ( $p=7\times 10^{-4}$ ), i.e. worse performance (**Figure 8B**), a higher FA in the SLFp accounted  
244 for lower IES ( $p=.003$ ), i.e. better behavioral performance (**Figure 8C**). A significant interaction term  
245 furthermore emerged for  $FA_{SLFt}$  and  $FA_{SLFp}$  with *Group* ( $p=.002$  and  $p=.023$ , associated with a negative  
246 and positive coefficient, respectively). A negative interaction term of  $FA_{SLFt}$  with *Group* indicates that  
247 the effect of  $FA_{SLFt}$  on IES for the TD group was relatively weaker than for the ADHD group. *Vice*  
248 *versa*, a positive interaction term of  $FA_{SLFp}$  with *Group*, denotes that the effect of  $FA_{SLFp}$  for the TD  
249 group was relatively stronger than for ADHD.

250 Given the strong association between the two regressors  $FA_{SLFt}$  and  $FA_{SLFp}$  ( $r=.86$ ,  $p=2\times 10^{-4}$ ; see  
251 correlation matrix in **Figure 5**) and based on the high degree of overlap between the two reconstructed  
252 tracts (as they overlapped anteriorly; **Figure 4,7**) more analysis was required to determine how SLFp  
253 and SLFt related to performance. We hence computed a measure describing the parietal-to-temporal  
254 SLF imbalance, according to:

$$FA_{SLF(p-t)} = \frac{FA_{SLFp} - FA_{SLFt}}{FA_{SLFp} + FA_{SLFt}} \quad \text{Eq.(3)}$$

255 As a result, a given subject would display a specific degree of parietal-to-temporal diffusivity (i.e.  
256 imbalance) along the SLF tract: A higher value of the imbalance reflects a stronger diffusivity at parietal  
257 locations along the tract, and a lower value along the gradient reflected a stronger diffusivity at temporal  
258 locations.

259 We therefore considered a model specifically incorporating the parietal-temporal imbalance:

$$IES \sim b_0 + (b_1 FA_{SLF(p-t)} + b_2 FA_{ATR}) * b_3 Group + \varepsilon \quad \text{mdl(1.a)}$$

260 **Figure 8D** shows the association between IES and  $FA_{SLF(p-t)}$ . As a corollary of Eq.(3), the negative  
261 partial association ( $p=.001$ ) shows that subjects with a higher parietal than temporal FA along the SLF  
262 tract, were also the ones with a better behavioral performance. Also in this model, a significant  
263 interaction ( $p=.006$ ) emerged between tract\*Group, which reflected that the effect of  $FA_{SLF(p-t)}$  on IES  
264 was stronger for the TD group compared to the ADHD.

### 265 **Fractional anisotropy of the ATR predicts ADHD symptoms**

266 In order to assess whether the FA values of the white matter ROIs were related to symptoms (as  
267 measured by ADHD-Rating Scale; ADHD-RS), we considered the full sample of participants. We  
268 included symptoms across both the TD and the ADHD (placebo condition) group, hence embracing the  
269 notion that ADHD symptomatology derives from a ‘spectrum’, rather than from a dichotomous  
270 distinction with TD peers. The following model was then applied:

$$ADHD - RS \sim b_0 + b_1 FA_{SLFT} + b_2 FA_{SLFP} + b_3 FA_{ATR} + \varepsilon \quad \text{mdl(2)}$$

271 The resulting model was significant ( $R^2=.22$ ,  $p=.01$ , **Figure 9A**), and  $FA_{ATR}$  was associated with a  
272 significant partial coefficient ( $p=.007$ ) showing a negative relationship with ADHD symptoms (**Figure**  
273 **9B, 9C**): higher FA in the ATR predicted an overall lower ADHD symptomatology.  $FA_{SLFP}$  and  $FA_{SLFT}$   
274 did not show a significant partial correlation with symptoms score ( $p=.494$  and  $p=.309$ , respectively).

### 275 **Parietotemporal gradient along the SLF reflects methylphenidate’s effect on preparatory beta** 276 **depression**

277 Finally, we sought to investigate the relationship between FA values in the selected ROIs, and the  
278 patterns of MPH associated beta depression ( $PI(\beta)$ ). As described in (1), MPH intake normalized  
279 aberrant beta depression in ADHD, initially lower as compared to controls. In a first model, we aimed  
280 at identifying whether a combination of FA values in the selected ROIs accounted for the degree to

281 which subjects were able to suppress their somatosensory beta power in preparation to a motor response  
282 (PI( $\beta$ )). To this end, we considered PI( $\beta$ )s for TD subjects and ADHD subjects in the placebo condition  
283 as dependent variable in the following model:

$$\text{PI}(\beta) \sim b_0 + (b_1 \text{FA}_{\text{SLFt}} + b_2 \text{FA}_{\text{SLFp}} + b_3 \text{FA}_{\text{ATR}}) * b_4 \text{Group} + \varepsilon \quad \text{mdl(3)}$$

284 The resulting overall model was not significant ( $p=.762$ ), neither were the main or the interaction effects  
285 in the regressors ( $\text{FA}_{\text{SLFt}} : p=.890$ ;  $\text{FA}_{\text{SLFp}} : p=.985$ ;  $\text{FA}_{\text{ATR}} : p=.754$ ,  $\text{FA}_{\text{SLFt}} * \text{Group} : p=.934$ ,  
286  $\text{FA}_{\text{SLFp}} * \text{Group} : p=.689$ ,  $\text{FA}_{\text{ATR}} * \text{Group} : p=.655$ ).

287 Next, given the effects of MPH on modulations of the beta oscillations within the ADHD group, we  
288 enquired whether, instead, a linear combination of the ROIs' FA properties, could explain the *changes*  
289 in beta depression following medication intake ( $\Delta\text{PI}(\beta)$ ). We hence implemented the following model,  
290 consistently with the principles abovementioned:

$$\Delta\text{PI}(\beta) \sim b_0 + (b_1 \text{FA}_{\text{SLFt}} + b_2 \text{FA}_{\text{SLFp}} + b_3 \text{FA}_{\text{ATR}}) * b_4 \text{mg}_{\text{MPH}} + \varepsilon \quad \text{mdl(4)}$$

291 Here, we added the term  $\text{mg}_{\text{MPH}}$  as a categorical variable to control for the dosage of MPH administered  
292 prior to the task (15/10mg). The resulting model was significant with  $R^2=.83$  and  $p=.003$  (**Figure 10A**).  
293 Analyses of main effects showed a significant negative association between  $\text{FA}_{\text{SLFt}}$  and  $\Delta\text{PI}(\beta)$  ( $b_1$ :  
294  $p=.001$ ) (**Figure 10B**), and a positive association between  $\text{FA}_{\text{SLFp}}$  and  $\Delta\text{PI}(\beta)$  ( $b_2$ :  $p=1 \times 10^{-4}$ ) (**Figure**  
295 **10C**), while no main effects for  $\text{FA}_{\text{ATR}}$  and  $\text{mg}_{\text{MPH}}$  were found ( $p=.910$  and  $p=.693$ , respectively).

296 The main effects in the model denoted a bigger MPH effect for subjects displaying higher FA in the  
297 SLFp, while subjects displaying higher FA in the SLFt were the ones whose sensorimotor beta was less  
298 affected by MPH administration.

299 Although the model produced significant interaction terms between  $\text{FA}_{\text{SLFt}}$  and  $\text{FA}_{\text{SLFp}}$  with  $\text{mg}_{\text{MPH}}$   
300 ( $p=.001$  and  $p=.002$ , respectively), we did not pursue any post-hoc examination of such effect, given a

301 very low ratio between 10/15mg dosage in the sample (0.38) would not produce statistically reliable  
302 results.

303 According to the same principle which led to mdl(1.a), we merged the two regressors  $FA_{SLFp}$  and  $FA_{SLFt}$   
304 into the gradient denoted as  $FA_{SLF(p-t)}$ , and considered an equivalent to mdl(4) as follows:

$$\Delta PI(\beta) \sim b_0 + (b_1 FA_{SLFT(p-t)} + b_2 FA_{ATR}) * b_3 \text{Group} + \varepsilon \quad \text{mdl(4.a)}$$

305 In **Figure 10D** we present an alternative and equivalent representation of the plot in **Figure 10B and**  
306 **C**, where the linear association between  $\Delta PI(\beta)$  and  $FA_{SLF(p-t)}$  is presented. Here, we can observe a  
307 significant positive partial association ( $p=7 \times 10^{-4}$ ) which indicates that subjects with a higher parietal  
308 compared to temporal FA along the SLF tract, were also the ones whose beta depression was more  
309 affected (enhanced) by MPH.

## 310 **Discussion**

311 In the current study, We employed DTI to estimate microstructural properties of main bilateral fasciculi  
312 and explored their role in mediating behavior and beta power modulation associated with ADHD  
313 symptomatology.

314 We first showed that, in both groups, lower values of fractional anisotropy within the ATR were related  
315 to ADHD symptom severity and that parieto-to-temporal FA-imbalance within the SLF accounted for  
316 behavioral performance in the attentional task. Importantly, in the ADHD group, the same SLF gradient  
317 was predictive of the effects of MPH on beta power modulation.

318 The ATR originates from anterior and medial nuclei of the thalamus and radiates along the anterior  
319 thalamic peduncle and the anterior limb of the internal capsule to reach the frontal cortex (54,55). The  
320 thalamocortical feedback loop is crucial in conscious processing, and its role in attention is to provide  
321 a functional link between otherwise structurally segregated cortical areas, supporting different aspects  
322 of attentional selection and working memory (56,57). Prior morphological analyses have shown that  
323 ADHD is associated with altered shape and volume of thalamic nuclei, whose connections within  
324 several cortical regions, particularly frontal areas, seem disrupted in affected children (58,59). On the  
325 other hand, there is still controversy over the validity of thalamic volume as anatomical correlate of the  
326 disorder, given that case-control volumetric differences in this area were not confirmed in a recent  
327 mega-analysis (60). However, that mega-analysis did provide evidence for a different influence of age  
328 on thalamic volumes between clinical and non-clinical samples. The thalamus is a rather complex  
329 structure composed of a set of cytoarchitectonically segregated nuclei, each providing specific  
330 thalamocortical signals and relying on partially independent neural circuitry to mediate different  
331 cognitive functions. Hence, a more valid investigation of thalamic involvement in the pathophysiology  
332 of ADHD should take into account an specific analysis of such diverse nuclei (61), so far still absent in  
333 the ADHD literature. Arguably, currently the most convincing effects with regard to thalamus role in  
334 ADHD, are found in the context of connectivity studies, pointing to the importance of fronto-striatal  
335 circuits and their disruption in association to the symptomatology (62). Here, we corroborated these

336 findings by embracing a different approach: the association between thalamocortical diffusivity and  
337 symptom severity we report, exploits the inherent heterogeneity in FA values among subjects, by  
338 linking this variance to behavioral symptomatology along the broader clinical spectrum. In other words,  
339 our results speak to the importance of thalamocortical connections in the interaction between attention  
340 and premotor functions which, if anomalous, are at the basis of clinical behavioral symptoms (as  
341 observed in ADHD).

342 We postulate that the strong interconnections between the thalamus and striatal regions, among which  
343 different basal ganglia nuclei, is one of the core variables into consideration when aiming at identifying  
344 structural correlates of ADHD. Reinforcing this finding, the TD group in our study displayed stronger  
345 anisotropic diffusivity along the ATR as compared to the ADHD group. Such notion further highlights  
346 the role of the basal ganglia and their morphological and volumetric differences as potential predictors  
347 of the disorder (60,63–68).

348 The second main and novel finding related the parieto-to-temporal FA-imbalance within the SLF with  
349 behavioral performance in the attentional task (in both groups): a higher FA in the parietal-SLF  
350 compared to the temporal-SLF predicted faster and more accurate responses in both ADHD and  
351 controls. Furthermore, in the ADHD sample, the same gradient explained the effects of MPH on beta  
352 modulation: individuals displaying higher FA in the parietal than the temporal SLF were also the ones  
353 whose beta power during response preparation increased more with MPH. FA along the SLF likely  
354 reflects the functions of the frontoparietal control network (FPCN). This network is one of the core  
355 anatomical components providing the basis of flexible attentional adaptations to different task demands  
356 (69). While the above results linking FA imbalance within the SLF to behavior and beta oscillations are  
357 seemingly orthogonal to the previous finding relating  $FA_{ATR}$  to symptoms severity, the former are not  
358 independent from thalamo-frontal influences. Indeed, the dopaminergic regulation of the prefrontal  
359 cortex and the striatum has been proposed to mediate the interaction between the different attentional  
360 systems (27,70,71), some of which structurally rely on the SLF.



361 Dopaminergic availability is modulated by MPH (21,24,72), which blocks the reuptake of the  
362 neurotransmitter, hence allegedly increasing the functional interactions within attentional networks.  
363 Given these premises, it is not surprising that diffusivity along the superior longitudinal fasciculus  
364 favors the effects of MPH: a stronger connectivity, as indexed by anisotropy along the tract, promotes  
365 communication between frontoparietal areas, which is further maximized by the stimulant's action.  
366 Crucially, we found that an imbalance of FA in favor of parietal rather than temporal regions is  
367 associated with stronger effects of medication on beta modulation. Important nodes of the FPCN are  
368 found in dorsolateral prefrontal cortex, frontal eye fields and intraparietal sulcus (73), regions that are  
369 connected by the dorsal fibers of the SLF (74). Previous studies have already proposed that the  
370 mechanisms of action of stimulant medication in ADHD are strongly reflected by its activity on  
371 frontoparietal regions (18,75), whose under-activation is one of the neural correlates of the disorder  
372 (76–78).

373 It is important to consider the link between dopaminergic coordination of attentional networks and  
374 increased beta modulation. Evidence from Parkinson's Disease (PD) patients has provided a theoretical  
375 framework according to which dopamine levels within the basal ganglia-cortical loop have a direct  
376 influence on beta oscillations (79,80). Anomalous beta oscillations are highly correlated with PD  
377 pathology (81), with evidence from in vivo recordings and mathematical models suggesting they  
378 originate from dopamine degeneration in cortical projections to the striatum (82–84). Coupled with  
379 findings of increased striatal dopamine transporter (thus lower dopaminergic availability) in ADHD  
380 (85–88), we here propose an attentional network which relies on the dopaminergic input from thalamo-  
381 striatal regions to the prefrontal cortex, which in turn mediates the activity along the FPCN. Higher FA  
382 along frontoparietal tracts tends to reflect increased connectivity and is being investigated as indirect  
383 tool to infer dopaminergic functions in the pathological brain (89–91). Relatively stronger parietal FA  
384 may thus underly a facilitatory mechanisms for MPH action in the brain, as revealed by a stronger  
385 increase in preparatory beta desynchronization in children displaying higher parietal-to-temporal FA  
386 gradient.

387 Although limited in its sample size, this study offers important new insights in the potential of  
388 multimodal imaging to investigate and identify the sources of attention performance in the brain: by  
389 coupling evidence from electrophysiological measures and information about white matter integrity,  
390 we are able to investigate the origin of aberrant brain activity observed in ADHD and improve our  
391 understanding of the mechanisms of action of stimulant medication. Furthermore, it might encourage  
392 future research on the issue, clarifying whether FA represents a predictor of MPH responsiveness or it  
393 is rather one of the neural targets of medication, as could potentially be inferred by longitudinal  
394 research.

#### 395 **Disclosures**

396 Jan K Buitelaar has been in the past 3 years a consultant to / member of advisory board of / and/or  
397 speaker for Janssen Cilag BV, Eli Lilly, Medice, Takeda/Shire, Roche, and Servier. He is not an  
398 employee of any of these companies, and not a stock shareholder of any of these companies. He has no  
399 other financial or material support, including expert testimony, patents, royalties. The remaining authors  
400 declare no competing and financial interests.

#### 401 **Acknowledgements**

402 The authors gratefully acknowledge the support of the Marie-Curie ITN grant ChildBrain (grant number  
403 641652).

## 404 References

- 405 1. Mazzetti C, ter Huurne N, Buitelaar JK, Jensen O. Methylphenidate normalizes aberrant beta oscillations and reduces alpha power  
406 during retention in children with ADHD. *bioRxiv* [Internet]. 2020 Jan 1;2020.03.13.990929. Available from:  
407 <http://biorxiv.org/content/early/2020/03/15/2020.03.13.990929.abstract>
- 408 2. van Ede F, Niklaus M, Nobre AC. Temporal Expectations Guide Dynamic Prioritization in Visual Working Memory through  
409 Attenuated  $\alpha$  Oscillations. *J Neurosci*. 2017;37(2):437–45.
- 410 3. Tzagarakis C, West S, Pellizzer G. Brain oscillatory activity during motor preparation: Effect of directional uncertainty on beta, but  
411 not alpha, frequency band. *Front Neurosci*. 2015;9(JUN):1–13.
- 412 4. Herring JD, Thut G, Jensen O, Bergmann TO. Attention modulates TMS-locked alpha oscillations in the visual cortex. *J Neurosci*.  
413 2015;35(43):14435–47.
- 414 5. van Ede F, de Lange FP, Maris E. Attentional Cues Affect Accuracy and Reaction Time via Different Cognitive and Neural  
415 Processes. *J Neurosci* [Internet]. 2012;32(30):10408–12. Available from:  
416 <http://www.jneurosci.org/cgi/doi/10.1523/JNEUROSCI.1337-12.2012>
- 417 6. Berger C, Müller-Godeffroy J, Marx I, Reis O, Buchmann J, Dück A. Methylphenidate promotes the interaction between motor  
418 cortex facilitation and attention in healthy adults: A combined study using event-related potentials and transcranial magnetic  
419 stimulation. *Brain Behav*. 2018;8(12):1–15.
- 420 7. Doyle LMF, Yarrow K, Brown P. Lateralization of event-related beta desynchronization in the EEG during pre-cued reaction time  
421 tasks. *Clin Neurophysiol*. 2005;116(8):1879–88.
- 422 8. American Psychiatric Association. Diagnostic and statistical manual of mental disorders : DSM-5. Association AP, Force APAD-5  
423 T, editors. Arlington, VA: American Psychiatric Association; 2013.
- 424 9. ter Huurne N, Onnink M, Kan C, Buitelaar J, Jensen O. Diminished modulation of preparatory sensorimotor mu rhythm predicts  
425 attention-deficit / hyperactivity disorder severity. *Psychol Med*. 2018;(2017):1947–56.
- 426 10. ter Huurne N, Onnink M, Kan C, Franke B, Buitelaar J, Jensen O. Behavioral consequences of aberrant alpha lateralization in  
427 attention-deficit/hyperactivity disorder. *Biol Psychiatry* [Internet]. 2013;74(3):227–33. Available from:  
428 <http://dx.doi.org/10.1016/j.biopsych.2013.02.001>
- 429 11. ter Huurne N, Lozano-Soldevilla D, Onnink M, Kan C, Buitelaar J, Jensen O. Diminished modulation of preparatory sensorimotor  
430 mu rhythm predicts attention-deficit/hyperactivity disorder severity. *Psychol Med*. 2017;47(11):1947–56.
- 431 12. Arns M, Vollebregt MA, Palmer D, Spooner C, Gordon E, Kohn M, et al. Electroencephalographic biomarkers as predictors of  
432 methylphenidate response in attention-deficit/hyperactivity disorder. *Eur Neuropsychopharmacol* [Internet]. 2018;28(8):881–91.  
433 Available from: <https://doi.org/10.1016/j.euroneuro.2018.06.002>

- 434 13. Vollebregt MA, Zumer JM, ter Huurne N, Buitelaar JK, Jensen O. Posterior alpha oscillations reflect attentional problems in boys  
435 with Attention Deficit Hyperactivity Disorder. *Clin Neurophysiol* [Internet]. 2016;127(5):2182–91. Available from:  
436 <http://dx.doi.org/10.1016/j.clinph.2016.01.021>
- 437 14. Lenartowicz A, Mazaheri A, Jensen O, Loo SK. Aberrant Modulation of Brain Oscillatory Activity and Attentional Impairment in  
438 Attention-Deficit/Hyperactivity Disorder. *Biol Psychiatry Cogn Neurosci Neuroimaging* [Internet]. 2018;3(1):19–29. Available  
439 from: <https://doi.org/10.1016/j.bpsc.2017.09.009>
- 440 15. Scahill L, Schwab-Stone M. Epidemiology of Adhd in School-Age Children. *Child Adolesc Psychiatr Clin N Am* [Internet].  
441 2000;9(3):541–55. Available from: <http://www.sciencedirect.com/science/article/pii/S1056499318301068>
- 442 16. Polanczyk G, Caspi A, Houts R, Kollins SH, Rohde LA, Moffitt TE. Implications of Extending the ADHD Age-of-Onset Criterion  
443 to Age 12: Results from a Prospectively Studied Birth Cohort. *J Am Acad Child Adolesc Psychiatry* [Internet]. 2010;49(3):210–6.  
444 Available from: <http://dx.doi.org/10.1016/j.jaac.2009.12.014>
- 445 17. Mazaheri A, Fassbender C, Coffey-Corina S, Hartanto TA, Schweitzer JB, Mangun GR. Differential oscillatory  
446 electroencephalogram between attention-deficit/ hyperactivity disorder subtypes and typically developing adolescents. *Biol*  
447 *Psychiatry* [Internet]. 2014;76(5):422–9. Available from: <http://dx.doi.org/10.1016/j.biopsych.2013.08.023>
- 448 18. Zammit N, Muscat R. Beta band oscillatory deficits during working memory encoding in adolescents with attention-deficit  
449 hyperactive disorder. *Eur J Neurosci*. 2019;(February):1–16.
- 450 19. Richter CG, Coppola R, Bressler SL. Top-down beta oscillatory signaling conveys behavioral context in early visual cortex. *Sci*  
451 *Rep* [Internet]. 2018;8(1):1–12. Available from: <http://dx.doi.org/10.1038/s41598-018-25267-1>
- 452 20. Engel AK, Fries P. Beta-band oscillations--signalling the status quo? *Curr Opin Neurobiol* [Internet]. 2010;20(2):156–65. Available  
453 from: <http://www.ncbi.nlm.nih.gov/pubmed/20359884>
- 454 21. Faraone S V. The pharmacology of amphetamine and methylphenidate: Relevance to the neurobiology of attention-  
455 deficit/hyperactivity disorder and other psychiatric comorbidities. *Neurosci Biobehav Rev* [Internet]. 2018;87(January):255–70.  
456 Available from: <https://doi.org/10.1016/j.neubiorev.2018.02.001>
- 457 22. Tang B, Dafny N. Dorsal raphe neuronal activities are modulated by methylphenidate. *J Neural Transm*. 2013;120(5):721–31.
- 458 23. Hodgkins P, Shaw M, Coghill D, Hechtman L. Amphetamine and methylphenidate medications for attention-deficit/ hyperactivity  
459 disorder: Complementary treatment options. *Eur Child Adolesc Psychiatry*. 2012;21(9):477–92.
- 460 24. Devilbiss DM, Kelley AE, Schmeichel B, Andrzejewski ME, Berridge CW, Hamilton C, et al. Methylphenidate Preferentially  
461 Increases Catecholamine Neurotransmission within the Prefrontal Cortex at Low Doses that Enhance Cognitive Function. *Biol*  
462 *Psychiatry*. 2006;60(10):1111–20.
- 463 25. Jarczok TA, Haase R, Bluschke A, Thiemann U, Bender S. Bereitschaftspotential and lateralized readiness potential in children with  
464 attention deficit hyperactivity disorder: altered motor system activation and effects of methylphenidate. *Eur Neuropsychopharmacol*

- 465 [Internet]. 2019;29(8):960–70. Available from: <https://doi.org/10.1016/j.euroneuro.2019.05.003>
- 466 26. Zhong P, Liu W, Yan Z. Aberrant regulation of synchronous network activity by the attention-deficit/hyperactivity disorder-  
467 associated human dopamine D4 receptor variant D4.7 in the prefrontal cortex. *J Physiol*. 2016;594(1):135–47.
- 468 27. Dang LC, O’Neil JP, Jagust WJ. Dopamine supports coupling of attention-related networks. *J Neurosci*. 2012;32(28):9582–7.
- 469 28. Alexander AL, Lee JE, Lazar M, Field AS. Diffusion tensor imaging of the brain. *Neurotherapeutics* [Internet]. 2007 Jul;4(3):316–  
470 29. Available from: <https://www.sciencedirect.com/science/article/pii/S1933721307000955>
- 471 29. Chang EH, Argyelan M, Aggarwal M, Chandon TSS, Karlsgodt KH, Mori S, et al. The role of myelination in measures of white  
472 matter integrity: Combination of diffusion tensor imaging and two-photon microscopy of CLARITY intact brains. *Neuroimage*  
473 [Internet]. 2017;147(June 2016):253–61. Available from: <http://dx.doi.org/10.1016/j.neuroimage.2016.11.068>
- 474 30. Le Bihan D, Mangin J-F, Poupon C, Clark CA, Pappata S, Molko N, et al. Diffusion tensor imaging: Concepts and applications. *J*  
475 *Magn Reson Imaging* [Internet]. 2001 Apr;13(4):534–46. Available from: <http://doi.wiley.com/10.1002/jmri.1076>
- 476 31. Assaf Y, Pasternak O. Diffusion tensor imaging (DTI)-based white matter mapping in brain research: A review. *J Mol Neurosci*.  
477 2008;34(1):51–61.
- 478 32. Beaulieu C. The basis of anisotropic water diffusion in the nervous system - A technical review. *NMR Biomed*. 2002;15(7–8):435–  
479 55.
- 480 33. Onnink AMH, Zwiers MP, Hoogman M, Mostert JC, Dammers J, Kan CC, et al. Deviant white matter structure in adults with  
481 attention-deficit/hyperactivity disorder points to aberrant myelination and affects neuropsychological performance. *Prog Neuro-*  
482 *Psychopharmacology Biol Psychiatry* [Internet]. 2015;63:14–22. Available from: <http://dx.doi.org/10.1016/j.pnpbp.2015.04.008>
- 483 34. Lei D, Ma J, Du X, Shen G, Jin X, Gong Q. Microstructural abnormalities in the combined and inattentive subtypes of attention  
484 deficit hyperactivity disorder: a diffusion tensor imaging study. *Sci Rep* [Internet]. 2014;4:6875. Available from:  
485 <http://www.nature.com/srep/2014/141103/srep06875/full/srep06875.html>
- 486 35. van Ewijk H, Heslenfeld DJ, Zwiers MP, Buitelaar JK, Oosterlaan J. Diffusion tensor imaging in attention deficit/hyperactivity  
487 disorder: A systematic review and meta-analysis. *Neurosci Biobehav Rev* [Internet]. 2012;36(4):1093–106. Available from:  
488 <http://dx.doi.org/10.1016/j.neubiorev.2012.01.003>
- 489 36. Damatac CG, Chauvin RJM, Zwiers MP, van Rooij D, Akkermans SEA, Naaijen J, et al. White matter microstructure in attention-  
490 deficit/hyperactivity disorder: a systematic tractography study in 654 individuals. *bioRxiv* [Internet]. 2020;787713. Available from:  
491 <http://biorxiv.org/content/early/2020/03/18/787713.abstract>
- 492 37. Aoki Y, Cortese S, Castellanos FX. Research Review: Diffusion tensor imaging studies of attention-deficit/hyperactivity disorder:  
493 meta-analyses and reflections on head motion. *J Child Psychol Psychiatry Allied Discip*. 2018;59(3):193–202.
- 494 38. de Schotten MT, Dell’Acqua F, Forkel SJ, Simmons A, Vergani F, Murphy DGM, et al. A lateralized brain network for visuospatial

- 495 attention. *Nat Neurosci* [Internet]. 2011;14(10):1245–6. Available from: <http://www.nature.com/doi/10.1038/nn.2905>
- 496 39. Marshall TR, Bergmann TO, Jensen O. Frontoparietal Structural Connectivity Mediates the Top-Down Control of Neuronal  
497 Synchronization Associated with Selective Attention. *PLoS Biol*. 2015;13(10):1–17.
- 498 40. Wolfers T, Onnink AMH, Zwiers MP, Arias-Vasquez A, Hoogman M, Mostert JC, et al. Lower white matter microstructure in the  
499 superior longitudinal fasciculus is associated with increased response time variability in adults with attentiondeficit/hyperactivity  
500 disorder. *J Psychiatry Neurosci*. 2015;40(5):344–51.
- 501 41. Witt ST, Stevens MC. Relationship between white matter microstructure abnormalities and ADHD symptomatology in adolescents.  
502 *Psychiatry Res - Neuroimaging* [Internet]. 2015;232(2):168–74. Available from:  
503 <http://dx.doi.org/10.1016/j.psychresns.2015.02.009>
- 504 42. Konrad A, Dielentheis TF, El Masri D, Bayerl M, Fehr C, Gesierich T, et al. Disturbed structural connectivity is related to inattention  
505 and impulsivity in adult attention deficit hyperactivity disorder. *Eur J Neurosci*. 2010;31(5):912–9.
- 506 43. Linszen AMW, Sambeth A, Vuurman EFPM, Riedel WJ. Cognitive effects of methylphenidate in healthy volunteers: A review of  
507 single dose studies. *Int J Neuropsychopharmacol*. 2014;17(6):961–77.
- 508 44. Carlson GA, Kelly KL. Stimulant Rebound: How Common Is It and What Does It Mean? *J Child Adolesc Psychopharmacol*.  
509 2003;13(2):137–42.
- 510 45. Quinn D, Bode T, Reiz JL, Donnelly GAE, Darke AC. Single-dose pharmacokinetics of multilayer-release methylphenidate and  
511 immediate-release methylphenidate in children with attention-deficit/ hyperactivity disorder. *J Clin Pharmacol*. 2007;47(6):760–6.
- 512 46. Yendiki A, Panneck P, Srinivasan P, Stevens A, Zöllei L, Augustinack J, et al. Automated probabilistic reconstruction of white-  
513 matter pathways in health and disease using an atlas of the underlying anatomy. *Front Neuroinform*. 2011;5(October):1–12.
- 514 47. Jbabdi S, Woolrich MW, Andersson JLR, Behrens TEJ. A Bayesian framework for global tractography. *Neuroimage* [Internet].  
515 2007;37(1):116–29. Available from: <http://dx.doi.org/10.1016/j.neuroimage.2007.04.039>
- 516 48. Fischl B, Salat DH, Busa E, Albert M, Dieterich M, Haselgrove C, et al. Whole Brain Segmentation: Automated Labeling of  
517 Neuroanatomical Structures in the Human Brain. *Neuron*. 2002;33(3):341–55.
- 518 49. Behrens TEJ, Berg HJ, Jbabdi S, Rushworth MFS, Woolrich MW. Probabilistic diffusion tractography with multiple fibre  
519 orientations: What can we gain? *Neuroimage*. 2007;34(1):144–55.
- 520 50. Mazzetti C, Staudigl T, Marshall TR, Zumer JM, Fallon SJ, Jensen O. Hemispheric asymmetry of globus pallidus relates to alpha  
521 modulation in reward-related attentional tasks. *J Neurosci* [Internet]. 2019 Oct 2;610–9. Available from:  
522 <http://www.jneurosci.org/content/early/2019/10/02/JNEUROSCI.0610-19.2019.abstract>
- 523 51. Beare R, Adamson C, Bellgrove MA, Vilgis V, Vance A, Seal ML, et al. Altered structural connectivity in ADHD: a network based  
524 analysis. *Brain Imaging Behav*. 2017;11(3):846–58.

- 525 52. Damatac CG, Zwiers M, Chauvin R, Rooij D Van, Sophie EA. Hyperactivity-impulsivity in ADHD is associated with white matter  
526 microstructure in the cingulum ' s angular bundle. 2019;1–17.
- 527 53. Ward EJ. A review and comparison of four commonly used Bayesian and maximum likelihood model selection tools. *Ecol Modell.*  
528 2008;211(1–2):1–10.
- 529 54. Jones EG. Thalamic circuitry and thalamocortical synchrony. *Philos Trans R Soc B Biol Sci.* 2002;357(1428):1659–73.
- 530 55. George K, M.Das J. Neuroanatomy, Thalamocortical Radiations. *StatPearls Publ [Internet].* 2019;January. Available from:  
531 <https://www.ncbi.nlm.nih.gov/books/NBK546699/>
- 532 56. Halassa MM, Kastner S. Thalamic functions in distributed cognitive control. *Nat Neurosci [Internet].* 2017;20(12):1669–79.  
533 Available from: <http://dx.doi.org/10.1038/s41593-017-0020-1>
- 534 57. Sherman SM. Thalamus plays a central role in ongoing cortical functioning. *Nat Neurosci.* 2016;19(4):533–41.
- 535 58. Xia S, Li X, Kimball AE, Kelly MS, Lesser I, Branch C. Thalamic shape and connectivity abnormalities in children with attention-  
536 deficit/hyperactivity disorder. *Psychiatry Res - Neuroimaging [Internet].* 2012;204(2–3):161–7. Available from:  
537 <http://dx.doi.org/10.1016/j.psychres.2012.04.011>
- 538 59. Svatkova A, Nestrasil I, Rudser K, Goldenring Fine J, Bledsoe J, Semrud-Clikeman M. Unique white matter microstructural patterns  
539 in ADHD presentations—a diffusion tensor imaging study. *Hum Brain Mapp.* 2016;37(9):3323–36.
- 540 60. Hoogman M, Bralten J, Hibar DP, Mennes M, Zwiers MP, Schweren LSJ, et al. Subcortical brain volume differences in participants  
541 with attention deficit hyperactivity disorder in children and adults: a cross-sectional mega-analysis. *The Lancet Psychiatry.*  
542 2017;4(4):310–9.
- 543 61. Battistella G, Najdenovska E, Maeder P, Ghazaleh N, Daducci A, Thiran JP, et al. Robust thalamic nuclei segmentation method  
544 based on local diffusion magnetic resonance properties. *Brain Struct Funct.* 2017;222(5):2203–16.
- 545 62. Cupertino RB, Soheili-Nezhad S, Grevet EH, Bandeira CE, Picon FA, Tavares ME, et al. Reduced fronto-striatal volume in ADHD  
546 in two cohorts across the lifespan. *bioRxiv [Internet].* 2019;i(51):790204. Available from:  
547 <https://www.biorxiv.org/content/10.1101/790204v1>
- 548 63. Paclt I, Přibilová N, Kollárová P, Kohoutová M, Dezortová M, Hájek M, et al. Reverse asymmetry and changes in brain structural  
549 volume of the basal ganglia in ADHD, developmental changes and the impact of stimulant medications. *Neuroendocrinol Lett.*  
550 2016;37(1):29–32.
- 551 64. Aylward EH, Reiss AL, Reader MJ, Singer HS, Brown JE, Denckla MB. Basal ganglia volumes in children with attention-deficit  
552 hyperactivity disorder. *J Child Neurol [Internet].* 1996;11(2):112–5. Available from:  
553 [http://www.ncbi.nlm.nih.gov/entrez/query.fcgi?cmd=Retrieve&db=PubMed&dopt=Citation&list\\_uids=8881987](http://www.ncbi.nlm.nih.gov/entrez/query.fcgi?cmd=Retrieve&db=PubMed&dopt=Citation&list_uids=8881987)
- 554 65. Qiu A, Crocetti D, Adler M, Mahone EM, Denckla MB, Miller MI, et al. Basal ganglia volume and shape in children with attention

- 555 deficit hyperactivity disorder. *Am J Psychiatry*. 2009;166(1):74–82.
- 556 66. Sethi A, Evelyn-Rahr E, Dowell N, Jain S, Voon V, Critchley HD, et al. Magnetization transfer imaging identifies basal ganglia  
557 abnormalities in adult ADHD that are invisible to conventional T1 weighted voxel-based morphometry. *NeuroImage Clin* [Internet].  
558 2017;15(March):8–14. Available from: <https://doi.org/10.1016/j.nicl.2017.03.012>
- 559 67. Von Rhein D, Oldehinkel M, Beckmann CF, Oosterlaan J, Heslenfeld D, Hartman CA, et al. Aberrant local striatal functional  
560 connectivity in attention-deficit/hyperactivity disorder. *J Child Psychol Psychiatry Allied Discip*. 2016;57(6):697–705.
- 561 68. Oldehinkel M, Beckmann CF, Pruim RHR, Van Oort ESB, Franke B, Hartman CA, et al. Attention-Deficit/Hyperactivity Disorder  
562 Symptoms Coincide with Altered Striatal Connectivity. *Biol Psychiatry Cogn Neurosci Neuroimaging* [Internet]. 2016;1(4):353–  
563 63. Available from: <http://dx.doi.org/10.1016/j.bpsc.2016.03.008>
- 564 69. Dixon ML, De La Vega A, Mills C, Andrews-Hanna J, Spreng RN, Cole MW, et al. Heterogeneity within the frontoparietal control  
565 network and its relationship to the default and dorsal attention networks. *Proc Natl Acad Sci U S A*. 2018;115(7):E1598–607.
- 566 70. Jenni NL, Larkin JD, Floresco SB. Prefrontal dopamine D1 and D2 receptors regulate dissociable aspects of decision making via  
567 distinct ventral striatal and amygdalar circuits. *J Neurosci*. 2017;37(26):6200–13.
- 568 71. Tomasi D, Wang GJ, Volkow ND. Association between striatal dopamine D2/D3 receptors and brain activation during visual  
569 attention: effects of sleep deprivation. *Transl Psychiatry*. 2016;6(5):e828.
- 570 72. Arnsten AFT. Stimulants: Therapeutic actions in ADHD. *Neuropsychopharmacology*. 2006;31(11):2376–83.
- 571 73. Xuan B, Mackie MA, Spagna A, Wu T, Tian Y, Hof PR, et al. The activation of interactive attentional networks. *Neuroimage*  
572 [Internet]. 2016;129:308–19. Available from: <http://dx.doi.org/10.1016/j.neuroimage.2016.01.017>
- 573 74. Makris N, Kennedy DN, McInerney S, Sorensen AG, Wang R, Caviness VS, et al. Segmentation of subcomponents within the  
574 superior longitudinal fascicle in humans: A quantitative, in vivo, DT-MRI study. *Cereb Cortex*. 2005;15(6):854–69.
- 575 75. Kowalczyk OS, Cubillo AI, Smith A, Barrett N, Giampietro V, Brammer M, et al. Methylphenidate and atomoxetine normalise  
576 fronto-parietal underactivation during sustained attention in ADHD adolescents. *Eur Neuropsychopharmacol* [Internet].  
577 2019;29(10):1102–16. Available from: <https://doi.org/10.1016/j.euroneuro.2019.07.139>
- 578 76. Rubia K, Halari R, Cubillo A, Smith AB, Mohammad AM, Brammer M, et al. Methylphenidate normalizes fronto-striatal  
579 underactivation during interference inhibition in medication-naïve boys with attention-deficit hyperactivity disorder.  
580 *Neuropsychopharmacology* [Internet]. 2011;36(8):1575–86. Available from: <http://dx.doi.org/10.1038/npp.2011.30>
- 581 77. Chiang HL, Chen YJ, Lo YC, Tseng WYI, Gau SSF. Altered white matter tract property related to impaired focused attention,  
582 sustained attention, cognitive impulsivity and vigilance in attention-deficit/hyperactivity disorder. *J Psychiatry Neurosci*.  
583 2015;40(5):325–35.
- 584 78. Cai W, Griffiths K, Korgaonkar MS, Williams LM, Menon V. Inhibition-related modulation of salience and frontoparietal networks



- 585 predicts cognitive control ability and inattention symptoms in children with ADHD. *Mol Psychiatry*. 2019;
- 586 79. Jenkinson N, Brown P. New insights into the relationship between dopamine, beta oscillations and motor function. *Trends Neurosci*  
587 [Internet]. 2011;34(12):611–8. Available from: <http://dx.doi.org/10.1016/j.tins.2011.09.003>
- 588 80. Moran RJ, Mallet N, Litvak V, Dolan RJ, Magill PJ, Friston KJ, et al. Alterations in brain connectivity underlying beta oscillations  
589 in parkinsonism. *PLoS Comput Biol*. 2011;7(8).
- 590 81. Cole SR, van der Meij R, Peterson EJ, de Hemptinne C, Starr PA, Voytek B. Nonsinusoidal beta oscillations reflect cortical  
591 pathophysiology in parkinson's disease. *J Neurosci*. 2017;37(18):4830–40.
- 592 82. McCarthy MM, Moore-Kochlacs C, Gu X, Boyden ES, Han X, Kopell N. Striatal origin of the pathologic beta oscillations in  
593 Parkinson's disease. *Proc Natl Acad Sci U S A*. 2011;108(28):11620–5.
- 594 83. Pavlides A, Hogan SJ, Bogacz R. Computational Models Describing Possible Mechanisms for Generation of Excessive Beta  
595 Oscillations in Parkinson's Disease. *PLoS Comput Biol*. 2015;11(12):1–29.
- 596 84. Wang DD, de Hemptinne C, Miocinovic S, Ostrem JL, Galifianakis NB, Luciano MS, et al. Pallidal deep-brain stimulation disrupts  
597 pallidal beta oscillations and coherence with primary motor cortex in Parkinson's disease. *J Neurosci*. 2018;38(19):4556–68.
- 598 85. Krause KH, Dresel SH, Krause J, Kung HF, Tatsch K. Increased striatal dopamine transporter in adult patients with attention deficit  
599 hyperactivity disorder: Effects of methylphenidate as measured by single photon emission computed tomography. *Neurosci Lett*.  
600 2000;285(2):107–10.
- 601 86. Jucaite A, Fernell E, Halldin C, Forsberg H, Farde L. Reduced midbrain dopamine transporter binding in male adolescents with  
602 attention-deficit/hyperactivity disorder: Association between striatal dopamine markers and motor hyperactivity. *Biol Psychiatry*.  
603 2005;57(3):229–38.
- 604 87. Tai YC, Chi MH, Chu CL, Chiu NT, Yao WJ, Chen PS, et al. Availability of Striatal Dopamine Transporter in Healthy Individuals  
605 With and Without a Family History of ADHD. *J Atten Disord*. 2019;23(7):665–70.
- 606 88. Hesse S, Ballaschke O, Barthel H, Sabri O. Dopamine transporter imaging in adult patients with attention-deficit/hyperactivity  
607 disorder. *Psychiatry Res - Neuroimaging* [Internet]. 2009;171(2):120–8. Available from:  
608 <http://dx.doi.org/10.1016/j.psychres.2008.01.002>
- 609 89. Lenfeldt N, Eriksson J, Åström B, Forsgren L, Mo SJ. Fractional Anisotropy and Mean Diffusion as Measures of Dopaminergic  
610 Function in Parkinson's Disease: Challenging Results. *J Parkinsons Dis* [Internet]. 2017 Feb 7;7(1):129–42. Available from:  
611 <https://www.medra.org/servlet/aliasResolver?alias=iospress&doi=10.3233/JPD-161011>
- 612 90. Lorio S, Sambataro F, Bertolino A, Draganski B, Dukart J. The Combination of DAT-SPECT, Structural and Diffusion MRI Predicts  
613 Clinical Progression in Parkinson's Disease. *Front Aging Neurosci*. 2019;11(March):1–13.
- 614 91. Shimony JS, Rutlin J, Karimi M, Tian L, Snyder AZ, Loftin SK, et al. Validation of diffusion tensor imaging measures of

615 nigrostriatal neurons in macaques. PLoS One [Internet]. 2018 Sep 5;13(9):e0202201. Available from:  
616 <https://doi.org/10.1371/journal.pone.0202201>

617

618

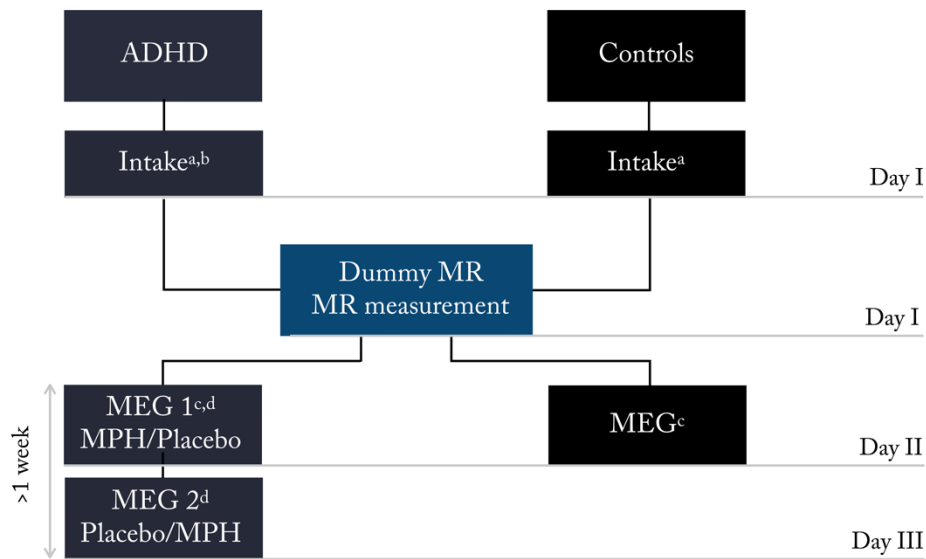

**Figure 1. Experimental study design.** <sup>a</sup> Case Report Form and Behavioural test (line bisection task, WISCIII *Vocabulary* and *Block design* subscales, ADHD rating scale, CBCL); <sup>b</sup> Psychiatric intake (basic medical screening and dosage determination); <sup>c</sup> Polhemus digitizer; <sup>d</sup> Medication intake (1 hour prior to the beginning of experimental task); Participants in the ADHD and Controls group visited the laboratory three and two times, respectively. During the first visit (day I) the psychiatric assessment took place, which determined participants' suitability for the study. The same day, the dummy MR took place, followed by the actual MR scan. The second day (day II) both groups performed the attentional task while electromagnetic activity was recorded with the MEG. The ADHD group performed the task twice (day II and day III), once upon administration of MPH, and once upon administration of a placebo pill. This was done according to a randomized crossover design, half of the participants received the MPH on day II,

619 **Figures**

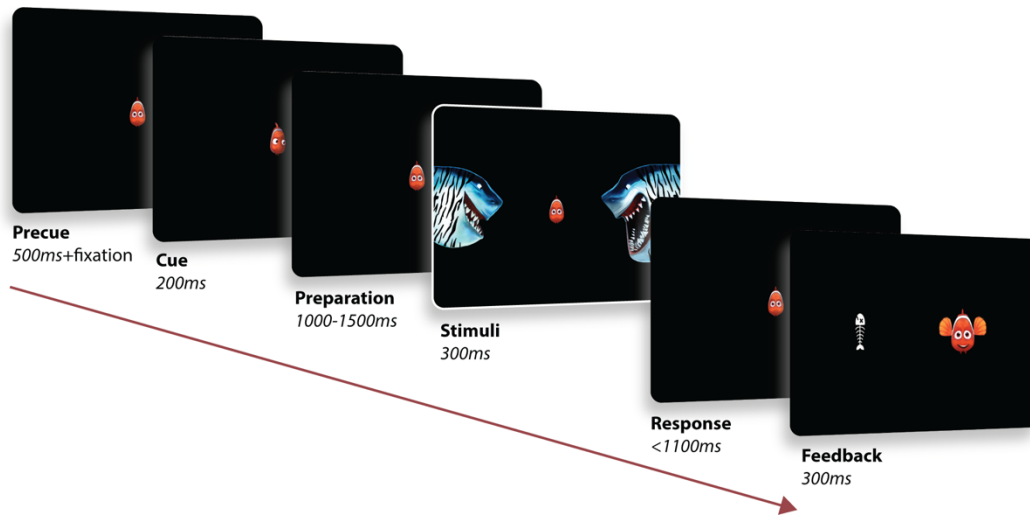

620 **Figure 2. Attentional task.** (Adapted from Mazzetti et al., 2020). The paradigm consisted in a child-friendly  
621 adaptation of a Posner cueing paradigm for the study of spatial orienting of attention. Each trial (370 in total)  
622 began with the presentation of a fish in the middle of the screen, serving as fixation cross. An eye tracker ensured  
623 that the children kept proper fixation throughout the whole trial (as trials were stopped in case the subject  
624 performed a saccade). A cue was then presented for 200ms, represented by the fish looking either at the left or  
625 right side of the screen (cue side equally distributed across trials). After a preparation interval jittered in the range  
626 1100 – 1500ms, the stimuli were then presented for 300ms, on the two sides of the screen. The child was asked  
627 to respond, via button press, indicating the position of the target (shark with an open mouth), while ignoring the  
628 distractor on the other side (shark with mouth closed). A positive feedback (happy fish) was then presented if a  
629 correct answer was provided within the response interval (1100ms). In case of wrong or no response, a negative  
630 feedback was presented (fish bone).

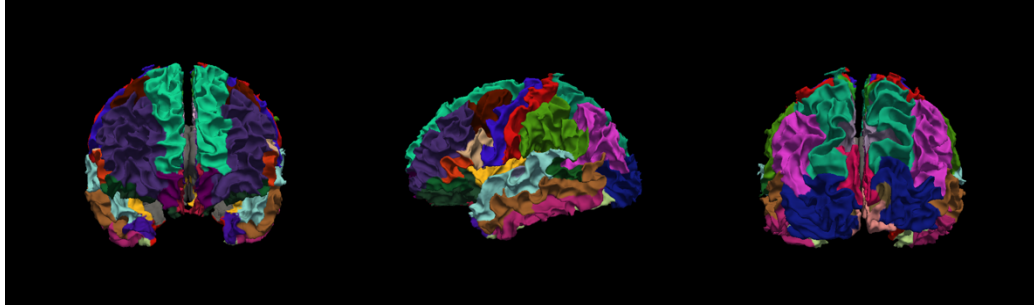

**Figure 3- 3D rendering of cortical parcellation based on Desikan-Killiany atlas in one sample TD subject.** A cortical parcellation was generated prior to tract estimation, which are combined with prior distributions on the neighboring anatomical structures of each pathway and subcortical segmentation to constrain the tractography solutions (obviating the need for user interaction thus automating the process).

**Figure 4 – 3D isosurface rendering and 2D orthographic view of tract reconstructions in one sample subject obtained using TRACULA.** Visualization of the probability distributions of all white-matter pathways simultaneously overlaid on 4D brain mask. All 18 tracts are displayed at 20% of their maximum threshold

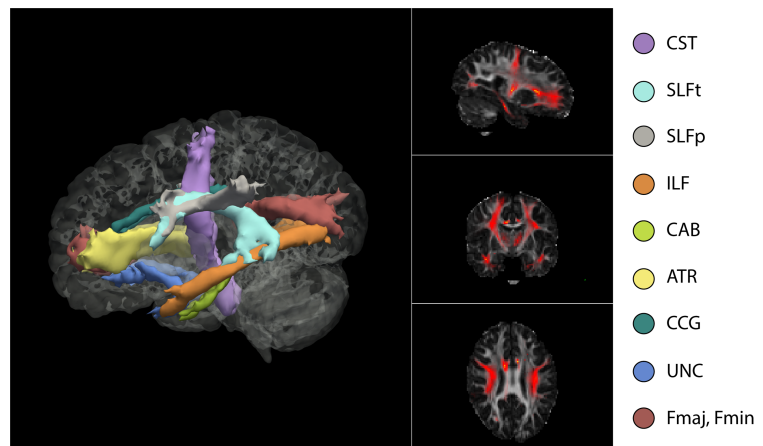

**Figure 5** – Correlation matrix of FA across bilateral white matter structures shows that no negative association subsists between segmented tracts.

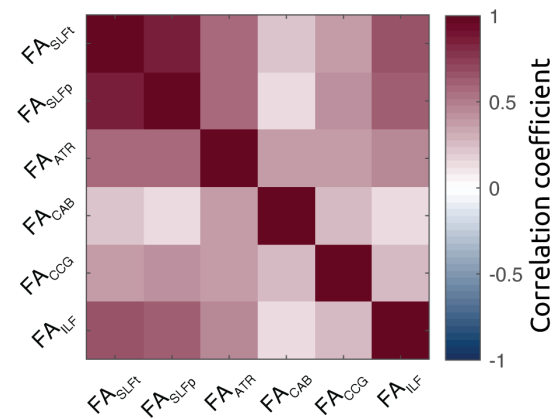

632

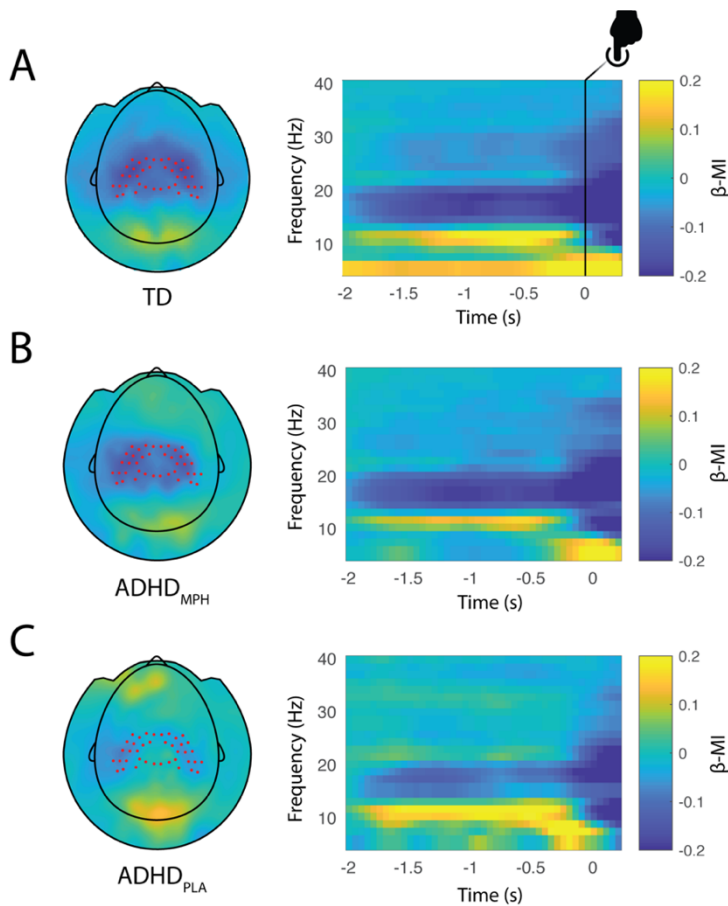

**Figure 6. Beta modulation indices in the three conditions** (adapted from (1)). Topographic plot (left) and respective time frequency representations (TFRs) (right panel) of power modulation ( $\beta$ -MI) for the typically developing group (TD) (A), ADHD<sub>MPH</sub> group (B) and ADHD<sub>PLA</sub> group (C). Red dots superimposed on the topographies denote sensors of interest as defined in Figure 4A. Notably, beta preparation is stronger in the TD group, while progressively decreases in the ADHD<sub>MPH</sub> group, being weakest in the ADHD<sub>PLA</sub> group.

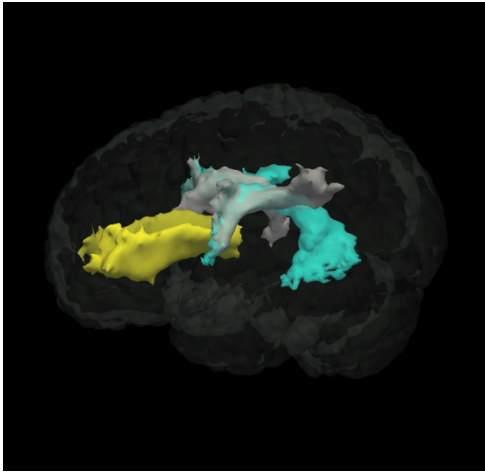

**Figure 7 – 3D rendering of white matter ROI.** Visualization of the probability distributions of the ROIs identified as tracts of interest according to the model selection approach: SLFp, SLFt and ATR.

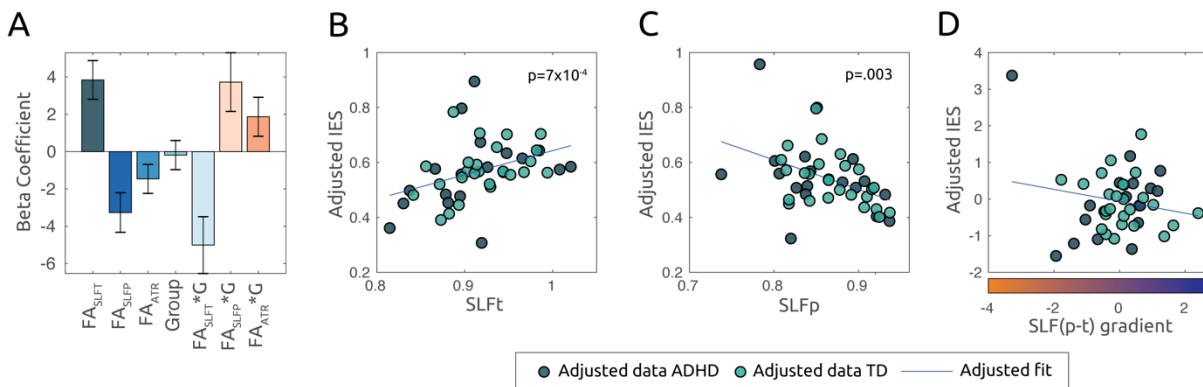

**Figure 8 – FA in SLFp and SLFt predict behavioral performance in the task.** A. The bar plot displays the beta coefficients associated with the linear mixed model mdl(1), where mean FA values within the identified tracts of interest are set as explanatory variables for behavioral performance, as indexed by the IES. Error bars indicate standard error of the mean. The adjusted response plots in B and C show, respectively, the behavioral performance (IES) as a function of the FASLft and, FASLfp, while averaging over other regressors in the model in (A). D. Adjusted response plot displaying the association between IES and parietotemporal gradient SLF(p-t), averaged over the residual regressors (mdl(1.a)). Positive SLF(p-t) values indicate higher FA along parietal as compared to temporal endings within the SLF.

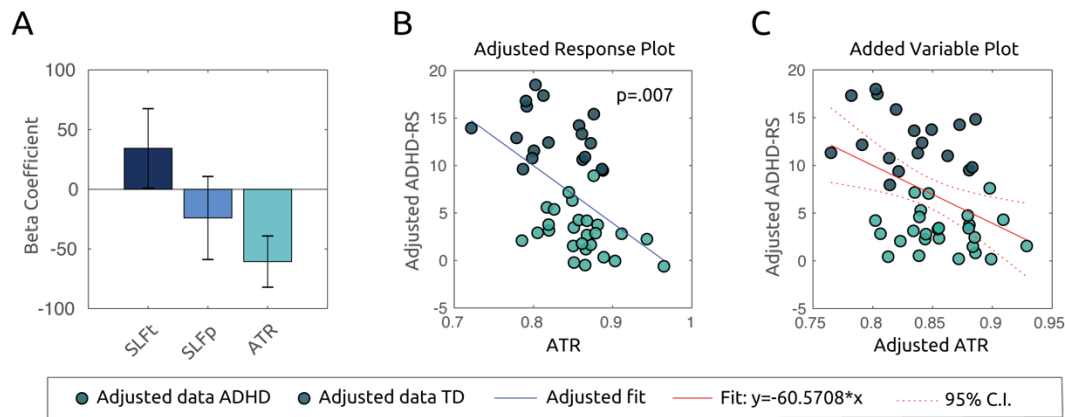

**Figure 9 – FA in ATR predicts ADHD symptoms severity in all subjects.** A. Bar plot shows beta coefficients associated with mdl(2), where mean FA values along the tracts of interest are defined as predictors for ADHD-RS symptoms score in all subjects. FAATR is associated with a significant partial regression coefficient ( $p=.007$ ). Scatter plots in B and C show, respectively, adjusted response plot averaged over the other predictors and the added variable plot (partial regression), of symptoms as a function of FAATR. Lower diffusivity along the ATR corresponded to higher average ADHD symptomatology along the spectrum.



635

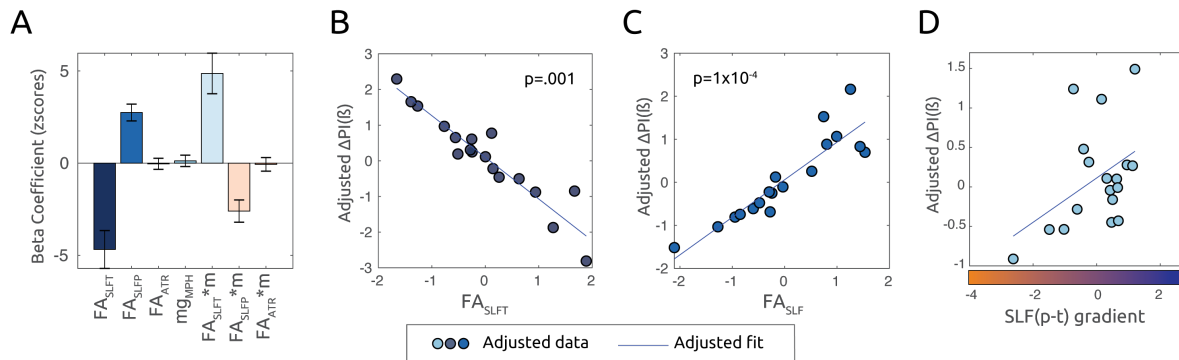

**Figure 10 – FA in SLFp and SLFt predict MPH effects on  $\beta$  depression in the ADHD group.** A. Bar plot shows beta regression coefficients associated with mdl(4), where mean FA values along the tracts of interest are defined as predictors for changes in beta modulation due to medication intake ( $\Delta PI(\beta)$ ). According to Eq.(2), a higher  $\Delta PI(\beta)$  value for a given ADHD subject reflects bigger changes in depression of beta oscillations following medication intake. B. Adjusted response plot showing  $\Delta PI(\beta)$  as a function of FASLFT. A significant beta coefficient ( $p=.001$ ) reveals that FASLFT predicted lower changes in  $\beta$  power depression due to MPH. C. Adjusted response plot showing  $\Delta PI(\beta)$  as a function of FASLFP. Higher FASLFP corresponded to stronger  $\beta$  depression changes following MPH intake ( $p=1 \times 10^{-4}$ ). D. Adjusted response plot illustrating  $\Delta PI(\beta)$  as a function of parieto-temporal SLF gradient according to mdl(4.a). Higher SLF(p-t), for a given ADHD subject, reflected higher diffusivity at parietal endings, as compared to temporal endings, of the SLF. The significant positive relationship ( $p=7 \times 10^{-4}$ ) suggests that the gradient of parieto-temporal diffusivity in the SLF is predictive of the effects of MPH on  $\beta$  depression.
